# Adaptive Dynamic Social Networks Using an Agent-Based Model to Study the Role of Social Awareness in Infectious Disease Spread

Leonardo López<sup>b</sup>, Leonardo Giovanini<sup>b</sup>

<sup>a</sup>Barcelona Institute for Global Health (ISGlobal), [leonardorafael.lopez@isglobal.org](mailto:leonardorafael.lopez@isglobal.org), Barcelona, , Spain

<sup>b</sup>Research institute for signals, systems and computational intelligence (since*i*), [lgiovanini@sinc.unl.edu.ar](mailto:lgiovanini@sinc.unl.edu.ar), Earth, Santa Fe, , Argentina

---

## Abstract

The synergy between the spread of infectious diseases and individual behavior is widely recognized. Our pioneering methodology introduces a model based on agents embedded within adaptive temporal networks, providing a nuanced portrayal of daily interactions through an agent-based paradigm. Each agent encapsulates the interactions of individuals, with external stimuli and environmental cues influencing their conduct. Comprising three intertwined elements—individual behavior, social dynamics, and epidemiological factors—the model has been validated against real-world influenza outbreaks, demonstrating superior performance compared to traditional methodologies. Our framework exhibits extensive versatility and applicability by encapsulating individual-level dynamics through elementary rules and simulating complex social behaviors such as social consciousness.

**Keywords:** Individual-based models, Self-organized systems, Epidemics model, multi-scale, Behavior, awareness, FCM

---

## 1. Introduction

The probability of large-scale disease outbreaks, such as epidemics and pandemics, increases with global connectivity. The Severe Acute Respiratory Syndrome (SARS) outbreak in 2003 (cdc, b), Ebola outbreaks (cdc, a), Asian influenza in 2017 (<https://www.facebook.com/WebMD>), and *COVID-19* (Kilbourne, 2006) are among the most severe outbreaks in recent history.

Death and illness are the immediate impacts of disease outbreaks, although their socioeconomic effects can be substantial (Barrett et al., 2011a). Depending on the overall state, short-term conditions can induce trends that lead to new social situations. For example, poor economic situations and disease prevalence can lock society into persistent states of poor health and wealth (Bonds et al., 2010). Disease outbreaks and prevalence can also affect government instability. Letendre et al. (2010) analyzed the effects of disease outbreaks on social health and wealth, and their impact on political systems. Persistent disease threats can lead to closing business (Bartik et al., 2020), educational impacts (Rosenthal et al., 2020), disproportionate burden of racial minorities and poor people (Fortuna et al., 2020), general heightened anxiety levels (Vigo et al., 2020) and domestic violence (Kofman and Garfin, 2020).

The essence of epidemic modeling resides in the intricate web of human interactions, influenced by diverse factors including economic conditions, social norms, cultural practices, and individual behaviors. Epidemiologists and healthcare experts employ an array of methodologies to comprehend the complexities of disease transmission dynamics (Barrett et al., 2011b), enabling them to predict and respond effectively to outbreaks. Traditional epidemiological models utilize ordinary differential equations to delineate disease dynamics, categorizing individuals into distinct compartments based on shared characteristics and computing the aggregate movement between these compartments over time (Hethcote, 2000). A plethora of literature offers insights into the application and interpretation of these classical models (Bjørnstad et al., 2020; Cutts et al., 2020; Epstein et al., 2008; Giordano et al., 2020).

Agent-based models (ABM) represent a distinct category of epidemic modeling, where individuals are depicted as agents endowed with unique attributes and behaviors. These agents interact within a simulated environment, generating opportunities for disease transmission. Local interactions give rise to outcomes such as the number of cases, enabling the assessment of outbreak intensity while considering localized characteristics and transmission routes. ABMs offer granularity, allowing the integration of factors like seasonal migrations, spatial distributions,

33 demographics, cultural practices, and individual behaviors (Railsback and Grimm, 2019). Research exploring the  
34 application of agent-based models spans various domains Adiga et al. (2018); Chen et al. (2016); Hoertel et al. (2020);  
35 Kuylen et al. (2020); Yeom et al. (2014).

36 The spread of diseases within populations underscores the importance of models representative down to the indi-  
37 vidual level, a crucial aspect of ABMs. These models define the characteristics of individuals including age, gender,  
38 marital status, and household income—as well as their activities, such as starting times, duration, and locations, along  
39 with their behaviors. Interactions between agents are simulated using contact networks, each imbued with properties  
40 that reflect specific circumstances. Disease dynamics unfold on these networks, evolving in response to changes in  
41 agents' health status, behaviors, and public policies. Subsequently, alterations in the network feedback into agents'  
42 behavior and health. Incorporating this co-evolution is essential for accurately modeling disease spread (Barrett et al.,  
43 2008). However, it introduces complexity, as individuals' schedules may vary based on the health status of those they  
44 interact with, as well as their demographics, health conditions, needs, social values, and preferences.

45 Dignum et al. (2020) proposed an *ABM* based on social simulation tools to analyze the social, economic, and health  
46 consequences of policy interventions during *COVID-19* pandemic. The agent's behavior is determined by a balance  
47 of the agent's needs over a set of possible social contexts, given that the agent's social value system is consistent with  
48 the social context.

49 Bissett et al. (2021) proposed an integrated multi-dimensional approach to simulating epidemics, addressing not  
50 only outbreak control but also related social issues like instability and inequality. It includes a theoretical framework,  
51 synthetic population generation, social network construction, and disease evolution simulation. This framework does  
52 not contemplate adaptive temporal networks or focuses on individual and social behaviors influenced by environmental  
53 cues explicitly. On the other hand, is not able to capture individual-level dynamics and complex social behaviors.

54 López et al. (2020) addressed the co-evolution problem using an adaptive dynamic networks framework where the  
55 disease dynamic results from the aggregation of the agents' behavior over a social network. It is modeled in a modular  
56 fashion such that results from aggregating three blocks: *i*) individual behavior, *ii*) social interactions, and *iii*) disease  
57 dynamics. In this way, the behavior of each agent is determined by external stimuli, as well as its perceptions and  
58 health state. The framework allows modeling different situations (quarantines, multiple strains and public policies,  
59 heterogeneity). The novelty of this framework lies on modeling a complex system through the logic of self-organized  
60 systems applied to a social network.

61 Palomo-Briones et al. (2022) proposed an *ABM* model that includes the cultural orientation of agents to determine  
62 their behavior. It models the double causality between individual behaviors, influenced by cultural orientation, and  
63 the evolution of a disease. They used the theory of planned behavior and Bayesian inference to model the decision-  
64 making processes implicit in an agent's behavior. A set of simulation experiments was developed to demonstrate the  
65 role that cultural orientation plays in the management of an epidemic.

66 Ventura et al. (2022) proposed a model for epidemic spreading in temporal networks of mobile agents that in-  
67 corporates local behavioral responses. Susceptible agents are allowed to move away from infected agents in their  
68 neighborhood. Recently, Gu et al. (2024) used this model to simulates the spread of the disease in the gathered pop-  
69 ulation by combining the susceptible–infected–susceptible epidemic process with human motion patterns, described  
70 by moving speed and gathering preference.

71 Our focus is the development of an *ABM* spatial framework for computational epidemiology using mobile agents  
72 to provide a quantitative understanding of the factors. The proposed model is a development of the one introduced by  
73 López et al. (2020). It is based on a self-organized logic with a model of the behavior of individuals that elucidates  
74 the relationships between individual behavior, activities, and their location with groups and social dynamics. The  
75 structure of this work unfolds as follows: In Section 2, we explore the motivation that underlies our model. Section 3  
76 offers a general description of the model, introducing the conceptual framework. The model is designed as an *ABM*  
77 where the behavior of each agent is determined by external stimuli and its perceptions of the environment. The model  
78 includes four interacting blocks: *i*) individual behavior, *ii*) activities, *iii*) social behavior, and *iv*) health state, providing  
79 a comprehensive representation of daily life interactions and their impact on epidemic dynamics. Section 4 explores  
80 the implementation details explaining how the model was translated into a computational framework to simulate the  
81 Spanish flu epidemic in Geneva in 1918. Subsection 4.4 outlines the estimation of its parameters for a specific case.  
82 It includes a thorough examination of the model's performance against real influenza epidemic data and a validation  
83 process. Section 4.5 shows and analyzes the results obtained with the model, demonstrating its efficacy in reproducing  
84 real data. Section 5 shows the model's versatility to model complex social behaviors, such as social awareness and

85 heterogeneous spatial distribution of agents. Finally, Section 6 summarizes the conclusions derived from this work  
 86 and suggests potential avenues for future research.

## 87 2. Modeling framework: Scope and Motivations

88 Complex systems consist of densely interconnected components with constrained nonlinear feedback. These  
 89 systems have multiple context-dependent relationships with interactions across various scales and domains. They  
 90 exhibit self-organizing behaviors that evolve, leading to characteristics such as trajectory dependence, nonlinearities,  
 91 and emergence. Similar conditions can lead to different outcomes, small inputs can cause large effects, and any  
 92 intervention may result in unintended consequences (Erten et al., 2017; Scarpino and Petri, 2019).

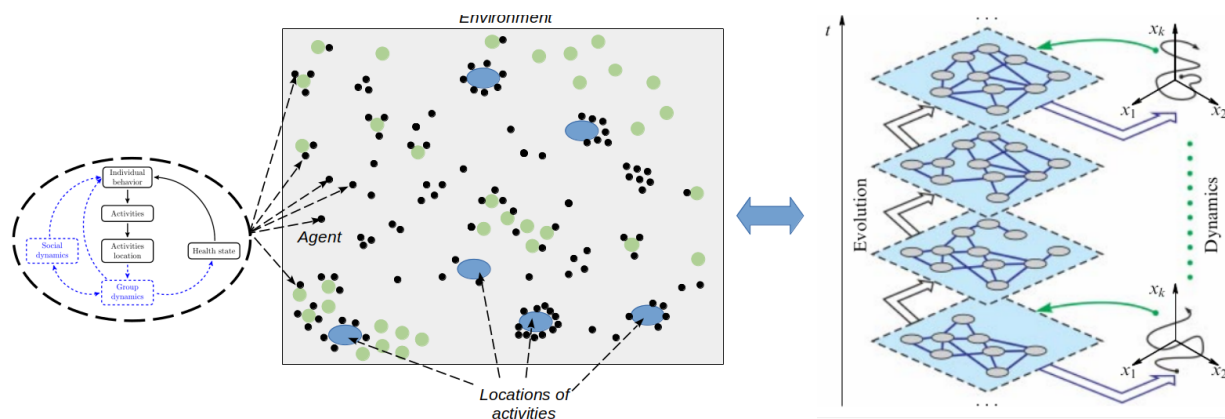

Figure 1: Model diagram and its components

93 This type of system can be modeled using *adaptive co-evolutionary networks*, where nodes represent individuals  
 94 and links represent interactions between them (Gross and Blasius, 2008). Our objective is to develop tools and  
 95 methods for constructing adaptive co-evolutionary networks to gain a quantitative understanding of the factors that  
 96 influence behaviors related to epidemic processes. The methodology includes: *i*) modeling and generating individuals,  
 97 *ii*) constructing social networks, and *iii*) simulating disease transmission. The purpose of this decomposition (Figure  
 98 1) is to simplify the system's description and clarify the connections between individual behavior (social values,  
 99 preferences, and needs), social practices, and contagion transmission, while employing the most appropriate tools.

## 100 3. Modeling framework

101 There are many challenges in developing *ABM* systems for epidemic modeling. First, we look for a theoretical  
 102 approach to describe, simulate, and analyze disease dynamics. For this purpose, we use *graph dynamical systems*  
 103 (Mortveit and Reidys, 2007). Second, we seek tools to model populations and the dynamics associated with the  
 104 disease. They need to represent different features of the behaviors and the activities performed by individuals. They  
 105 are by nature incomplete and, at different levels of granularity, may be contradictory.

### 106 3.1. Evolving graph dynamical systems

107 A graph dynamical system (*GDS*) is an abstract representation of a group of interacting entities (*agents*) and the  
 108 nature of their interactions (Funke et al., 2019; Mortveit and Reidys, 2007). This representation provides a solid basis  
 109 to develop models of *diffusion–reaction processes* where contagions (viruses, disease, and opinions, among others)  
 110 are any entity that can propagate through a system.

111 An *evolving graph dynamical system (EGDS)*  $S(\mathcal{G}, \mathcal{V}, \mathcal{E}, \mathcal{X}, F_V, R)$  describes a *GDS* that evolve through time.  
 112 Here  $G(V, E_k) \subseteq \mathcal{G}$  is the set of graphs with vertex  $V \in \mathcal{V}$  and edges  $E_k \in \mathcal{E}$ . We use directed dependency graphs,  
 113 where the direction represent on which vertex the contagion is present. At each sampling time  $k \in \mathbb{N}_{\geq 0}$ , each agent  
 114  $i \in V$  is assigned a state  $x_{i,k} \in X \subseteq \mathcal{X} \subseteq \mathbb{R}^n$  is the vertex state set. The system state at time  $k$  is given by  $x_k =$

115  $[x_{1,k}, \dots, x_{m,k}]^T$ , where  $m = |V|$  is the number of agents in the system such that the system will have  $|V|^m$  possible  
 116 states.

117 Let  $N_k[i] \in \mathcal{V}$  be the set of all vertices adjacent to node  $i$  at time  $k$ . It is identified from the connectivity graph  
 118  $G_k = G(V, E_k)$  by searching of all distance- $r$  neighbors. A vertex function  $f_v(x_{i,k}, x_{j \in N_k[i],k}) \in F_V$  is assigned to each  
 119 agent  $i$  that describes its state transition  $x_{i,k+1} = f_v(x_{i,k}, x_{j \in N_k[i],k})$ . The vertex of system agents comprise the sequence  
 120  $F = [f_v(x_{i,k}, x_{j \in N_k[i],k})] \forall i \in V$  such that  $x_{k+1} = F(x_k)$ .

121 The vertex functions  $f_v(\cdot) \in F_V$  are evaluated in an order determined by  $R$ . The most common update schemes are  
 122 **synchronous** and **sequential**. In synchronous update scheme  $f_v(\cdot) \forall i \in V$  are executed **simultaneously** and the system  
 123 state is given by  $x_{k+1} = F(x_k)$ . In a sequential update scheme, vertex functions are executed **one-at-a-time** with the  
 124 states of all other vertices remaining unchanged. The order in which vertices are updated is determined using one of  
 125 the possible permutations  $\Pi = (\pi_1, \dots, \pi_m) \forall v \in V$  such that the system state is given by  $x_{k+1} = F_\Pi(x_k)$ , where  $F_\Pi(\cdot)$   
 126 is the composition of the local functions  $F_\Pi = F_{\pi_m} \circ F_{\pi_{m-1}} \circ \dots \circ F_{\pi_2} \circ F_{\pi_1}$ . The sequence of states  $(x_0, x_1, \dots, x_{t_f})$   
 127 describes the evolution of the system from initial state  $x_0$  to a specified final time  $t_f$  ( $x_{t_f}$ ) associated with a sequence  
 128 of configurations  $G_k \forall k \in [1, \dots, t_f]$ .

129 **Example** - Here we now introduce an example to illustrate the ideas described above. Lopez et al. (López et al.,  
 130 2020) modeled the transmission of a disease on an evolving contact network built up from a stochastic automaton  
 131 whose transitions are controlled by a function that determines the transition probability based on the health state,  
 132 environment, and perceptions of individuals. The changes on the social network are a function of simulation variables  
 133 such as the duration of contact between infected and susceptible individuals and number of infected, among others.  
 134 Then, the health component of the vertex function is given by

- 135 • If  $x_{v,k} = R$  then  $x_{v,k+1} = R$  independent of the state of vertex's neighbors;
- 136 • If  $x_{v,k} = I$  and  $k = t_v^i + t_{dI}$ , where  $t_v^i$  is the time when agent  $v$  was infected and  $t_{dI}$  is the infection period, then  
 137  $x_{v,k+1} = R$  otherwise  $x_{v,k+1} = x_{v,k}$ ;
- 138 • If  $x_{v,k} = S$  and  $\forall u \in N_k[v]$  that  $x_{u,k} = I$  then  $x_{v,k+1} = I$  with probability  $p_v$  and  $x_{v,k+1} = x_{v,k}$  with probability  
 139  $(1 - p_v)$  then  $x_{v,k+1} = R$  independent of the state of vertex's neighbors;

140 The individual-to-individual contact graph is produced by the agent's position within the cellular automaton, con-  
 141 sidering a Moore neighborhood of radius  $r \geq 0$ , controlled by the individual behavior module. The behavior of  
 142 agents is determined by factors like perception of the environment, knowledge of the epidemic situation, number of  
 143 infected individuals, assessments of the epidemiological situation, experiences, feelings, and health state. These fac-  
 144 tors determine the mobility and dimension of the neighboring zone  $r$ . The agents move randomly through the cellular  
 145 automata.

146 The interaction between health and behavior components of the vertex function determines if the individual would  
 147 move or not and its relationship with its environment. Then, these actions modify the group of individuals with whom  
 148 interact, modifying the social network. It is easy to see that the vertex function  $f_v(\cdot) \forall v \in V$  is a composition of its  
 149 components: individual behavior, social behavior, and health state modules.

### 150 3.2. Framework elements

151 There has been an increasing interest in understanding how social networks evolve in time. The observation of the  
 152 network at a specific time represents a state of the system, from which meaningful information can be computed. An  
 153 **artificial population** represents a group of individuals, which can range from a family to the people of a continent.  
 154 Individuals in an artificial population are endowed with demographic traits (*age, gender, home location, and habits*,  
 155 among others), behaviors and activity patterns where individuals go to particular locations and times.

156 Typically, these populations are **not one-to-one** with targeted populations. Rather, distributions of characteristics  
 157 of an artificial population match to those ones of the real one. Thus, the construction of an artificial population is  
 158 typically one realization of a family of instances. The generation of an artificial population comprises the definition  
 159 and imputation of the following features:

- 160 • **Characteristic of individuals** - Agents have different attributes such as age, gender, income, size, and health  
161 conditions;
- 162 • **Activities of individuals** - Each agent is assigned an agenda of activities during a day, week, and month, along  
163 with their schedule;
- 164 • **Locations for activities** - A location is assigned to each activity using all the information and data sources  
165 available like commercial, public buildings, leisure, and industrial locations. In case of having no information,  
166 a gravity model (locations closer to home) is used;
- 167 • **Individual health state** - A disease progression model is assigned to each agent to determine its evolution. It  
168 must include information about the disease states, as well as propagation and contagion mechanisms;
- 169 • **Individual behavior** - Promotes adaptive responses to problems that individuals face every day (Barrett et al.,  
170 2011a). Attitudes and reactions to external stimuli like communication, personal circumstances, and social  
171 norms are assigned to each agent; and
- 172 • **Social behavior** - Agents interact between them and with the surrounding environment. These interactions are  
173 modeled using self-organizing behaviors derived from a Lagrangian framework.

174 Agents interact with others located in the same places, generating **groups** with fixed structures (e.g., agents located  
175 at home, workplaces, or regular activities) or time-varying structures (e.g. agents located in transportation hubs,  
176 commercial centers, health services, amenity places, or occasional activities). In this context, agents can change their  
177 health state, due to the presence of infected agents, modifying their perceptions and behavior, and changing the group's  
178 structure. The resulting vertex functions  $f_v(\cdot) \forall v \in V$  is a composition of these three blocks in a given surrounding  
179 neighborhood. At a higher level of aggregation, groups interact between them giving rise to **social dynamics**. Groups  
180 behave like agents and aggregate their dynamics at larger time and space scales. The social and group dynamics  
181 determine the topology and characteristics of the network, whose nodes are the agents, at the local and global levels  
182 respectively. Its evolution depends on the behavior of agents, creating feedback loops between agents (nodes), groups  
183 (close networks of other agents), and social (the complete network of agents).

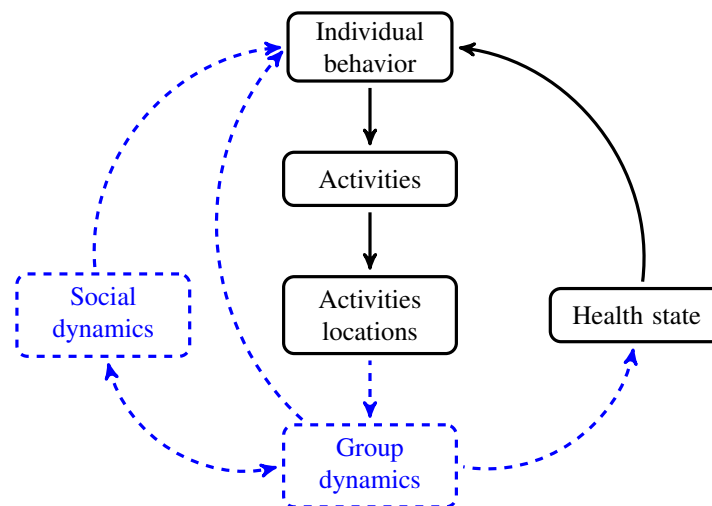

Figure 2: Building blocks of the proposed framework.

184 Figure 2 shows Basis Model Unit proposed in this framework. The building blocks and their relationships are  
185 denoted in continuous black while the system emergent blocks and their relationships are denoted in dash blue. The  
186 social dynamics (time evolution of the network topology) depend on the behavior of agents (dynamic of the nodes),  
187 regulated by their health state and group (social) dynamic. In turn, the group (social) dynamic is regulated by the  
188 location of activities performed by the agents, which are determined by their behaviors. Then, the social dynamic

189 emerges from the feedback dynamic loops between agents (network nodes) within groups (local network topology)  
 190 and between groups (global network topology).

191 Figure 3 shows the connections between the blocks used to model the behavior of agents and the connections  
 192 with others. The proposed framework links the macro level (*populations*) with intermediate (*group*) and micro level  
 193 (*agent*) using agents aggregation. The group behavior results from the aggregation of agents in the same location.  
 194 Using a similar approach, we derive the behavior of a subset of the population by consolidating smaller groups before  
 195 considering the entire population as a whole.

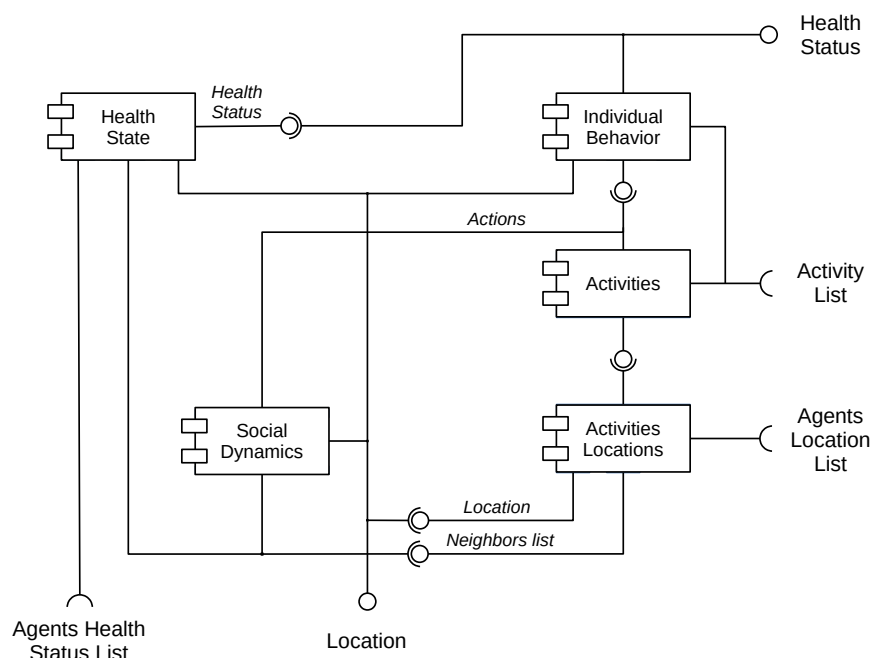

Figure 3: Diagram of the behavior of individuals showing its components and connections

### 196 3.2.1. Characteristic of individuals

197 A baseline population is comprised of different data sources like national census, polls, and surveys produced  
 198 by the national's central public statistical services, universities, and international organizations, among others. They  
 199 provide social, demographic, and economic information about the population and its subdivisions. Census and surveys  
 200 usually provide data resolved to geographical region levels. For each region, tables of demographic characteristics  
 201 -like age, gender, and household composition- provide information about their marginal distributions. Then, we must  
 202 formulate a joint distribution from this information to assemble a population of agents. This distribution is sampled  
 203 as many times as the number of agents of the model. A similar procedure is followed to generate the households.

204 If no information about this issue is available, a distribution with *a priori* characteristics is assumed such that  
 205 satisfies the closest modeling hypothesis to the situation.

### 206 3.2.2. Activities of individuals

207 Data from different sources produced by central national statistical services, universities, and international orga-  
 208 nizations, among others, are used to set up daily activity sequences for each agent. National census and polls contain  
 209 detailed information on an agent's activities throughout a period.

210 The activity patterns can be modeled with an *extended finite state machine (EFSM)*. It is an extension of a *finite*  
 211 *state machines* that includes additional features like parameters, actions, and guards. They provide better modeling  
 212 capabilities that allow *EFSMs* to handle complex state-based behaviors (Masek et al., 2018). Parameters support  
 213 passing information between states, actions enable the execution of specific tasks during state transitions, and guards

214 provide additional conditions for transitions. Within this framework, states encapsulate the range of activities acces-  
215 sible to each individual, inputs denote the variables shaping activity choices, and outputs dictate the specific activity  
216 undertaken by the agent at any given moment, thereby dictating the individual's temporal whereabouts.

217 Formally, an *EFSM* is defined by the tuple  $\mathcal{A} = (\mathcal{X}, \mathcal{U}, \mathcal{Y}, x_0, \mathcal{D}, \mathcal{L}, \mathcal{H}, \Upsilon, \Lambda)$ , where  $\mathcal{X}$  is a finite state set,  $x_0 \in \mathcal{X}$   
218 is the initial state,  $\mathcal{U}$  is the input set,  $\mathcal{Y}$  is the output set,  $\mathcal{D}$  is an  $n$ -dimensional linear space  $D_1 \times \dots \times D_n$ ,  $\mathcal{L}$  is  
219 a set of Boolean functions of input variables  $l_i : D \rightarrow \{0, 1\}$  that defines guard conditions,  $\mathcal{H}$  is a set of update  
220 functions  $h_i : D \rightarrow D$ ,  $\Upsilon$  is transition function  $\Upsilon : \mathcal{X} \times D \times \mathcal{U} \rightarrow \mathcal{X}$  and  $\Lambda$  is the output function  $\Lambda : \mathcal{X} \times D \rightarrow \mathcal{Y}$ .  
221 The transition function  $\Upsilon(x_k, u_k, l_i(D))$  decides what the next state will be  $x_{k+1}$  given the current state  $x_k$ , input  $u_k$   
222 and guards conditions  $l_i(D)$ . This means that a transition not only depends on the current state and input but also  
223 conditions independent of them. The output function  $\Lambda(x_k, h_i(D))$  determines which will be the agent's outputs.

224 *EFSMs* offer several advantages, compared with other tools for modeling the behaviors of agents:

- 225 • **Expressiveness** - It provides a modeling framework that allows modeling complex and flexible state and input-  
226 based behaviors;
- 227 • **Flexibility** - It can model multiple levels of abstraction and nested behaviors;
- 228 • **Complex decision-making** - It can handle a wider range of scenarios and dynamic behaviors, based on adapt-  
229 able and context-aware conditional transitions and specific tasks execution;
- 230 • **Model timing and concurrency** - Actions can be executed after a certain period or transitions can respond to  
231 concurrent events.

232 Activity routines within a household are often interrelated, with the presence of one member influencing the activities  
233 of others. For instance, if a child under the age of twelve is at home, there will typically be an adult present. As  
234 a result, activity sequences are structured within households to maintain these correlations. Essentially, households  
235 are chosen for survey purposes based on their similarity over individual characteristics: a person within a survey is  
236 selected that is most similar to a synthetic individual and that survey person's activities are assigned to the synthetic  
237 individual.

### 238 3.2.3. Location of activities

239 Each activity must be located within the modeling space, therefore, methods for designating (i) residential ad-  
240 dresses, (ii) public transport stations, (iii) workplaces, (iv) shopping centers, and (v) recreational facilities must be  
241 implemented.

242 Home locations can be assigned using data produced by national and regional statistical services, governmental  
243 agencies, and private organizations. Similarly to previous Subsections, home locations can be selected by similar-  
244 ity of individual characteristics between data and synthetic individuals, measured with distribution and set distance  
245 measures. Web mapping platforms contain information about residential locations, streets, road maps, and public  
246 transport networks.

247 Locations of workplaces, commercial centers, amenities, and businesses for individuals can be assigned combining  
248 information from data produced by governmental and private organizations, as well as web mapping platforms. If no  
249 information about their locations, they can be assigned using gravity models or uniformly. The concept involves  
250 assigning locations for activities based on a probability that is directly relative to the capacities of the buildings and  
251 inversely related to the distances from the current location..

### 252 3.2.4. Individual health state

253 The health status of an agent dictates its epidemiological condition throughout the epidemic process. This aspect  
254 captures the disease progression within agents (*intra-host*). Various tools can be employed to model this progression,  
255 depending on the specific modeling requirements and the type of information available and exchanged. Differential  
256 equations, automaton, probabilistic models, and immune-response models are among the possible tools.

257 One effective tool for modeling health state dynamics is the *EFSM*, which offers a robust approach for capturing  
258 the intricate state-based behavior of disease progression. *EFSM* enables the combination of timed deterministic and  
259 probabilistic transitions. It supports multiple co-circulating diseases, various strains, disease co-factors, and sophisti-  
260 cated interventions, such as contact tracing and antiviral reserves. Moreover, *EFSM* facilitates the modeling of various

261 epidemiological scenarios, including isolation measures, immunization efforts, and multiple strains, by adjusting the  
262 states and transitions accordingly, all while maintaining computational simplicity.

### 263 3.2.5. Individual behavior

264 Human behavior is affected by countless factors including interpersonal communication, emotions, personal be-  
265 liefs, and perceptions. Responses towards diseases are determined by a combination of these factors, choosing among  
266 the available alternatives. Different models have been proposed to represent this component of the behavior of indi-  
267 viduals (Anderson et al., 2004; Carruthers, 2011; Dao-Ping et al., 2007).

268 Emotions are mechanisms that allow individuals to respond to stimuli from the environment. They overpower  
269 the decision-making process to select a suitable reaction when there is too much information to process or too little  
270 time to react. Emotions evolved to maintain the functional balance of individuals by counteracting the information  
271 and energy flow by reducing their effect on them. Emotions like pain, anger, nervousness, security, relaxation, and  
272 excitement, can be seen as self-regulatory homeostatic mechanisms (Kowalczyk and Czubenko, 2016). They are the  
273 result of a complex chain of connected events with stimuli, including feelings, psychological changes, impulses to  
274 action, and goal-directed behaviors (Plutchik, 2001).

275 There are two main theories to describe the creation (or triggering) of emotions. *Appraisal theory* gives pre-  
276 ponderance to cognitive processes over emotions, such that emotions emerge from the analysis of stimuli through  
277 cognitive processes (Lazarus, 1991). On the other hand, *somatic theory* gives preeminence to emotions over cognitive  
278 processes, such that an individual can immediately invoke emotions associated with specific events without analyzing  
279 the stimuli. Surveys on modeling emotions can be found in (Heida and Nagai, 2022; Van Haeringen et al., 2023),  
280 among others.

281 Emotional states can be characterized in terms of their similarity, intensity, and duration, among other parameters.  
282 Emotions can be classified into three levels (Xiao-Juan and Wei-Ren, 2007):

- 283 • **Primary emotions** - are individuals' intrinsic responses to external stimuli. They are connected with both  
284 somatic (spontaneous physical feelings, dependent on specific stimulus) and appraisal (associated with objects,  
285 places, or situations from previous experiences) theories. They last from a few seconds to minutes;
- 286 • **Secondary emotions** - emerge when primary emotions are linked to both current and past perceptions and  
287 experiences. These emotions can be consciously recognized and verbalized. They are associated with both  
288 theories, potentially intertwined with motivational factors. These emotions exhibit slow changes and can persist  
289 from a few minutes to several weeks; and
- 290 • **Senior emotions** - are those produced by the course of long-term social contacts in a given environment (Dama-  
291 sio, 1994). They are based on personality and last years.

292 In literature, one can find many works concerning the issue of modeling human emotions: *CBI* (Marsella, 2003), *EMA*  
293 (Gratch and Marsella, 2004), *FLAME* (El-Nasr et al., 2000), *FearNot!* (Dias et al., 2014), *Thespian* (Si et al., 2006),  
294 *Peactidm* (Marinier III et al., 2009) and *Wasabi* (Becker-Asano and Wachsmuth, 2010), among others. However, none  
295 of these models have been used in the epidemiological modeling context.

296 Fuzzy Cognitive Maps (*FCM*) provide a powerful tool for modeling systems in terms of interacting concepts, that  
297 represent a state or a characteristic, and linkages, that express their relationship, in a hierarchical structure (Karyotis  
298 et al., 2018). A *FCM* incorporates both the experience and the accumulated knowledge of the system, which is derived  
299 from the expertise of individuals who understand the system's operation and its components under various conditions,  
300 often based on statistical analysis. In this model, concepts are represented as nodes, and the connections between these  
301 nodes depict the causal relationships among them. These maps model a collection of concepts and the cause-effect  
302 relationships between them. Interconnections between different concepts  $C_i$  and  $C_j$  are characterized by a weight  $w_{ij}$ ,  
303 which describes the degree of causality and influence between them (Mei et al., 2014). Weights can take values within  
304 interval  $[-1, 1]$  such that their values quantify the causality and their sign indicates the type: **positive** when  $w_{ij} > 0$   
305 ( $C_i$  increases then  $C_j$  increase) and **negative** when  $w_{ij} < 0$  ( $C_i$  decreases then  $C_j$  decreases).

### 306 3.2.6. Social behavior

307 In multi-agents systems, groups of agents interact and evolve within the environment. Their simulation allows  
308 direct evaluation of agents' behaviors and interactions (as well as groups and systems) in response to changes in the



309 agents and the environment (Epstein, 2006). Properties at agent's level correspond to the characteristics, behaviors,  
 310 health status, and activities of the agent. Group-level (local) properties match to the characteristics, behaviors, health  
 311 state, and activities of a group of agents defined by their neighborhood. They emerge from the aggregation of the  
 312 agents' properties as a result of the interaction between them and the environment. Finally, system-level properties  
 313 are the global properties of the environment in which agents live and emerge as a result of the interaction between  
 314 groups (Epstein, 2006).

315 In his seminal papers, Reynolds (Reynolds, 1987, 1999, 2000) proposed a consensus-based algorithm that has  
 316 been widely studied for modeling multi-agent systems. In this context, agents make use of information exchange  
 317 between them to reach a common value (known as a *consensus*) for cohesive behavior as a group. Following this  
 318 idea, multi-agent systems can be modeled as a group of  $m$  agents with a simple dynamic

$$\begin{aligned} \dot{r}_i &= -\lambda v_i, & r_i(0) &= r_i^0 & i \in \mathbb{Z}_{\leq m}, & \lambda \geq 0 \\ \dot{v}_i &= u_i, & v_i(0) &= v_i^0 \end{aligned} \quad (1)$$

319 where  $r_i = (x_i, y_i)^T$  is their position in space,  $v_i = (\dot{x}_i, \dot{y}_i)^T$  their velocity and  $u_i = (u_i^x, u_i^y)^T$  is their input that modifies  
 320 their behavior (Olfati-Saber, 2006). The input  $u_i$  is given by

$$u_i = f_i^C + f_i^A + f_i^R \quad i \in \mathbb{Z}_{\leq m}, \quad (2)$$

321 where  $f_i^R$  is a term that model the local behavior of agent  $i$  through a short-range random movement,  $f_i^C$  is a consensus  
 322 term that quantifies the interactions of agent  $i$  with agents in its neighborhood

$$f_i^C = \sum_{j \in \mathcal{N}_i} \phi_C(r_{j,k}, r_{i,k}), \quad (3)$$

323 where  $\mathcal{N}_i$  denotes the group of neighbors and  $\phi_C(r_{j,k}, r_{i,k})$  is the consensus term with the agents in the neighboring  
 324 zone (see Figure 4). The term  $f_i^A$  quantifies the interactions of agent  $i$  with the associated locations of activities and  
 325 environment

$$f_i^A = \sum_{j \in \mathcal{L}_i} g_{i,j,k} \phi_A(r_{j,k}, r_{i,k}), \quad (4)$$

326 where  $\mathcal{L}_i$  denotes the set of activities locations for agent  $i$ ,  $\phi_C(r_{j,k}, r_{i,k})$  is the consensus term with activities locations,  
 327 represented as rendezvous points, and  $g_{i,j,k}$  is an output of the Individual behavior block that indicates which activity is  
 328 performed or not ( $g_{i,j,k} = 1$  or  $g_{i,j,k} = 0$ ). Agents representing locations and obstacles are configured with predetermined  
 329 behaviors. For instance, stationary agents depict obstacles and fixed locations (Figure 4).

330 Social behavior is determined by the day-to-day routines of individuals, which is broken down into smaller time  
 331 scales like hours and divided into social activities and non-social activities like staying at home. This behavior is  
 332 modeled through an *EFSM* whose states represent the activity that the agent is going through. In this sense, the *EFSM*  
 333 serves as an intermediate layer between the individual behavior and the group dynamics (and the social dynamics),  
 334 affecting how individuals move through the grid (Figure 1). Individual behavior takes into account the influence of  
 335 other agents and the environment; and their objectives through the function  $g_{i,j,k}$ .

336 Then, the behavior of the systems arises from the aggregation of the behaviors of the agents that compose it (self-  
 337 organization). The idea of self-organization rests on the premise of *individual rationality* (Cristiani et al., 2015; Lee,  
 338 2011), a doctrine in which each agent pursues the best possible outcome for himself. In this way, each agent tries to  
 339 do the best for himself taking into account the effects of the actions of the rest on itself. Then, the behavior of the  
 340 system results from the superposition of the behaviors of agents, the emergent behavior of the system, which is more  
 341 complex than the simple aggregation of the behaviors of agents (Helbing et al., 2011).

342 The collective behavior of individuals within groups arises from their individual actions and interactions with  
 343 others. These interactions are modeled using feedback functions, which are governed by finite state automata with  
 344 probabilistic transitions. These transitions, determined by the time variable, dictate the movement or actions of indi-  
 345 viduals. Further elaboration on this topic will be provided in subsequent sections.

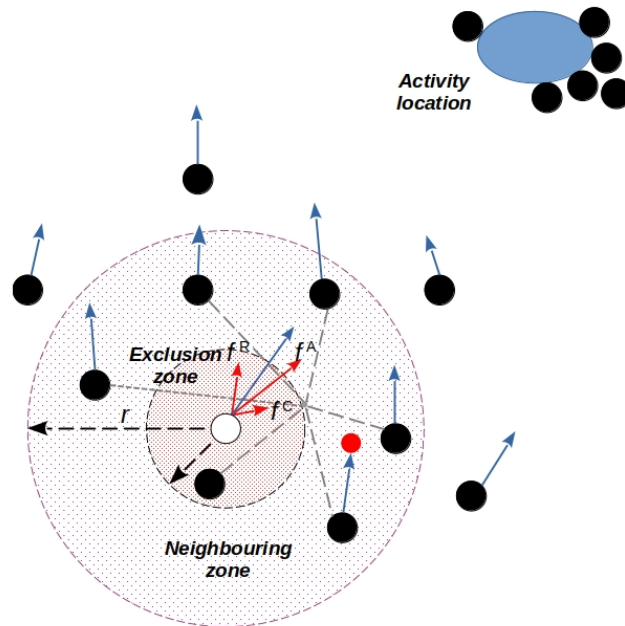

Figure 4: Illustration of agents' behavioral components.

#### 346 4. Epidemiological simulation

347 The modeling framework proposed in Section 3 is used to model the Spanish flu epidemic in the Swiss canton  
 348 of Geneva in 1918 (Chowell et al., 2006) and explore the effects of agents behavior on the spread of influenza over  
 349 the population. The interaction network emerges from the aggregation of the behavioral building blocks (individual  
 350 behavior, activities, and health state) of agents interacting between them and with the surrounding environment. The  
 351 agents and locations serve as nodes within the evolving structure of the social network, where interaction patterns  
 352 fluctuate in response to shifts in an agent's health condition (e.g., opting to stay home when unwell) and behavior  
 353 (e.g., minimizing non-essential activities during an outbreak), alongside public interventions (e.g., school closures,  
 354 vaccination drives). Consequently, this dynamic network influences individual health outcomes, such as minimizing  
 355 exposure to infectious agents outside the home or increasing contact with infected individuals within it.

356 The processes of between-host transmission and within-host progression are intricately linked yet computed in-  
 357 dependently. Between-host transmission initiates the within-host disease progression, transitioning the agent's health  
 358 state from susceptible to infected. The progression of the disease is entirely dictated by the health state (a compo-  
 359 nent of the vertex function) governing within-host progression. It is modeled with a stochastic *EFSM* that supports  
 360 multiple co-circulating diseases and heterogeneity, among other features. On the other hand, disease transmission  
 361 is determined by the health state of agents within a neighborhood (group dynamic), governed by the aggregation of  
 362 agents' behavior and locations of activities performed by them (the other two components of the vertex function). The  
 363 agent behavior is modeled using a *FCM*, which is able of representing their behavior toward the main external stimuli  
 364 of the environment. The sequence of activities is modeled using a stochastic *EFSM* such that we model agents' habits  
 365 (deterministic transitions) with unexpected events. All of this is also affected by the demographics of individuals  
 366 (e.g. agent's income and susceptibility to disease influence their decision on work, and physical needs and confidence  
 367 influence their decision to practice sports).

##### 368 4.1. Individual health state

369 Agent's epidemic state is defined as: *EFSM*  $\mathcal{A} = (X, \mathcal{U}, \mathcal{Y}, x_0, \Upsilon, \Lambda)$  where  $X$  is a finite set of states,  $u_i \in \mathcal{U} \subseteq$   
 370  $\mathbb{R}_{[0,1]}$   $i \in \mathcal{N}_v$  is the probability of contagion between agents  $v$  and  $i \in \mathcal{N}_v$  and  $y_{v,k} \in \mathcal{Y} \subseteq \mathbb{R}_{[0,1]}$  is the infection  
 371 rate such that  $y_{v,k} = u_{i,k} \in \mathcal{N}_v$ . The set of epidemic states, denoted as  $X$ , encompasses six distinct conditions:  $S$   
 372 for susceptible,  $E$  for exposed,  $I$  for infectious symptomatic,  $A$  for infectious asymptomatic,  $R$  for recovered, and  $D$

373 for deceased or unoccupied. The initial state vector  $x_0$  of each agent is assigned in a probabilistic way such that the  
 374 number of infected (symptomatic and asymptomatic), exposed, and susceptible is equal to the initial conditions of the  
 375 epidemic. The infection process transitions from  $E$  to  $I$  or  $A$ , developing after an incubation period  $\tau_I$ . On the other  
 376 side, the recovery process occur after the recovery period  $\tau_R$ . The output  $y_{v,k} = \Lambda(x_{v,k}) = \omega x_{v,k}$  computes the infection  
 rate only if the agent is in state  $I$  ( $\omega = \beta$ ) or  $A$  ( $\omega = q$ ), otherwise  $\omega = 0$ .

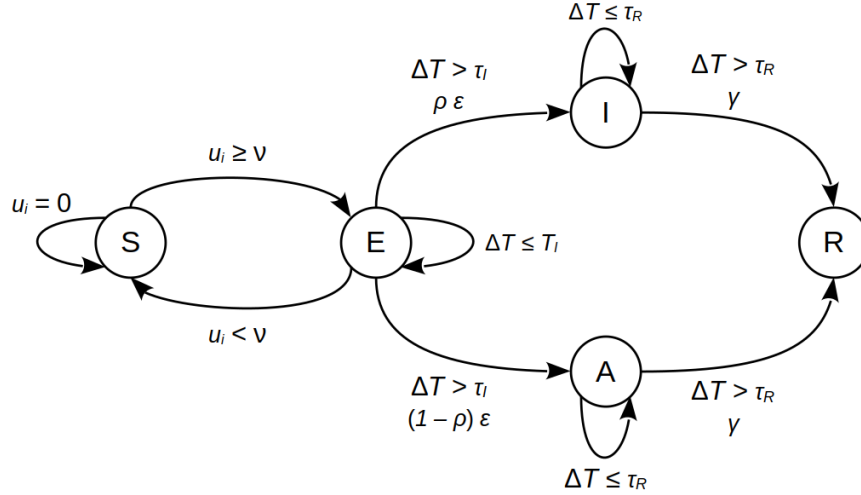

Figure 5: State graph of the epidemic states model

377 The diagram presented in Figure 5 illustrates the state transition graph and parameters defining the epidemic state  
 378 within the *EFSM*. Here,  $\beta$  represents the transmission probability,  $\rho$  denotes the proportion of reported infectious  
 379 individuals,  $\gamma$  signifies the recovery rate,  $\alpha$  indicates the diagnosis rate,  $q$  represents the infection rate among asymp-  
 380 tomatic individuals,  $N_e$  represents the initial population of exposed individuals,  $N_i$  signifies the initial population of  
 381 infectious individuals, while  $\tau_I$  and  $\tau_R$  correspond to the incubation and recovery periods, respectively.  
 382

383 When an agent is in state  $S$ , it receives an active input  $u_i \in \mathcal{U}$  if agent  $i \in \mathcal{N}_v$  is in either state  $I$  or  $A$ . This  
 384 input signifies the probability of between-host transmission resulting from interactions between agents  $v$  and  $i$ . The  
 385 state transition function, denoted as  $\Upsilon : \mathcal{X} \rightarrow \mathcal{X}$ , is applied to  $x_{v,k}$ , probabilistically determining  $x_{v,k+1}$ . This function  
 386 operates in two stages: one governing state changes due to infection and recovery, and another governing movement.  
 387 State changes are determined using two probability matrices: one for transitions under no input (Table 1), where  $\mu$   
 388 represents the probability of natural death and  $\gamma$  represents the probability of recovery, and another for transitions  
 389 resulting from contact with infectious individuals (Table 2).

|     | $S$       | $E$                    | $I$                  | $A$                  | $R$       |
|-----|-----------|------------------------|----------------------|----------------------|-----------|
| $S$ | $1 - \mu$ | 0                      | 0                    | 0                    | 0         |
| $E$ | 0         | $1 - (\epsilon + \mu)$ | 0                    | 0                    | 0         |
| $I$ | 0         | 0                      | $1 - (\gamma + \mu)$ | 0                    | $\gamma$  |
| $A$ | 0         | 0                      | 0                    | $1 - (\gamma + \mu)$ | $\gamma$  |
| $R$ | 0         | 0                      | 0                    | 0                    | $1 - \mu$ |
| $D$ | $\mu$     | $\mu$                  | $\mu$                | $\mu$                | $\mu$     |

Table 1: Probabilistic transition matrix derived from classical model parameters (López et al., 2020), reflecting an aggregation of individual probabilities in large populations. The model explores variations in spatial distributions and population sizes.

390 The derivation of the transition matrix originates from classical model parameters (Chowell et al., 2006). While  
 391 deterministic in nature within the classical model, they manifest as an aggregation of individual probabilities, predi-  
 392 cated on the assumption of a sufficiently large population. Consequently, it is the probabilistic transition that underpins

393 the classical model, rather than vice versa. Direct application of  $\Upsilon$  to each agent reveals a diminishing variability with  
 394 population growth, ultimately converging with the deterministic evolution of the classical model. Moreover, the ini-  
 395 tial distribution of individuals within the environment may be random, conforming to the hypothesis of homogeneous  
 396 distribution in large population sizes. Additionally, the model offers exploration into various spatial distributions and  
 397 population sizes.

|     |                   |               |
|-----|-------------------|---------------|
|     | $S$               | $E$           |
| $S$ | $1 - \lambda/\nu$ | $\lambda/\nu$ |
| $E$ | $0$               | $1$           |

Table 2: Matrix representing transitions between agent states upon contact occurrence

398 The output function  $\Lambda : \mathcal{X} \rightarrow \mathcal{Y} \in \mathbb{R}$  computes the infection rate based on an individual's state:  $I(\rho, \beta)$  or  
 399  $A(1 - \rho, \beta)$ , where  $\rho \in \mathbb{R}_{[0,1]}$  denotes the probability of infection upon contact with an asymptomatic individual.  
 400 This probability, distinct from the classic model's  $\beta'$ , represents the likelihood of transmission through contact. The  
 401 potential number of infectious contacts  $c$  is influenced by the neighborhood size, governing connectivity with other  
 402 network nodes, albeit not directly correlating with the contact count. The infection rate for each infectious individual  
 403 arises from the interplay between the  $\beta'$  probability and the potential number of contacts  $c$ . The  $\beta$  value, derived from  
 404 parameter settings, is determined by the neighborhood size selection and the  $\beta'$  parameter from the classical model,  
 405 computed as  $\beta = \beta' c$ .

#### 406 4.2. Social behavior

407 Social behavior plays a pivotal role in shaping individual interactions, exerting a significant influence on the  
 408 dynamics and structure of social networks. Utilizing self-organization principles rooted in Lagrangian concepts  
 409 (Mogilner et al., 2003; Cucker and Smale, 2005; Olfati-Saber, 2006), the social behavior of agents is modeled. Here,  
 410 individual behaviors define the collective behavior of the system, illustrating emergent properties arising from the  
 411 aggregation of individual actions. Consequently, an agent's actions are not solely influenced by local cues but also  
 412 by the collective information within the system. One approach to defining behavior is through the rules proposed by  
 413 Olfati-Saber (Olfati-saber, 2006).

- 414 • Avoid collision with neighboring agents;
- 415 • Minimize interactions with neighboring agents; and
- 416 • Move to target locations.

417 To obtain these behaviors, the consensus terms  $\phi_{C_i}(\cdot)$  and  $\phi_{A_i}(\cdot)$  of input  $u_i$  (equation 2) are given by

$$\begin{aligned}
 \phi_{C_i} &= \frac{1}{(1 + \|r_{j,k} - r_{i,k}\|^2)^{\beta_i}} & j \in \mathcal{N}_i, \\
 \phi_{A_i} &= 4\epsilon_i \left[ \left( \frac{\sigma_i}{(\|r_{j,k} - r_{i,k}\|)} \right)^{12} - \left( \frac{\sigma_i}{(\|r_{j,k} - r_{i,k}\|)} \right)^6 \right] & j \in \mathcal{L}_i
 \end{aligned} \tag{5}$$

418 where  $\beta_i = 0.5$ ,  $\sigma_i = 1.0$  and  $\epsilon_i = 1.0$ . The consensus terms associated with activities  $\phi_{A_j}(\cdot)$   $j \in \mathcal{L}_i$  are modulated  
 419 by the output of the *EFSM* that models the activities of the agents through  $g_{i,j,k}$ .

420 Since we have no information about the activities performed by individuals at Geneva in 1918, we will assume  
 421 a simple activity model: agents can move to the nearest social center (*SC*) (i.e. schools, offices, public transport  
 422 stations, among others) and then come back to home (*H*), or remain in the same place (*R*), home or social center. In  
 423 other words, they determine where they move to.

424 Figure 6 summarizes the *EFSM* that models the activities performed by agents. For simplicity, it was decided to  
 425 model the activities of agents at social centers (*SC*) or their homes (*H*). When agents move from a state of rest (*M*),  
 426 they stay in the same place but move randomly in the vicinity (due to  $f^R$  component of social behavior). The output

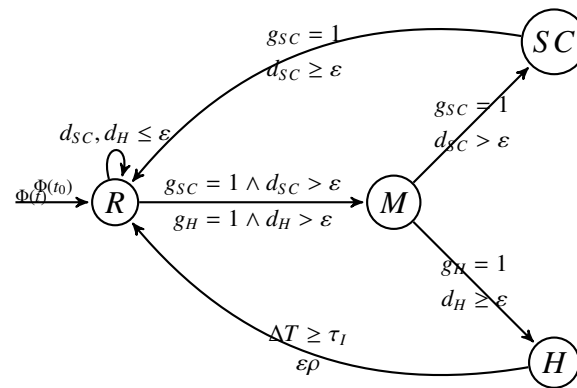

Figure 6: Model for agents activities.

of the *FCM* affects the decision of performing (or not) a given activity, determining if agents move toward a place or not (cancel or no contact with other agents). In this way, the activities performed by agents are determined by time-dependent transition functions that determine the following states (activity) in the *EFSM*. These time constraints are modeled through the guard, timing, and concurrency conditions of the states.

#### 4.3. Individual behavior

Individual behavior is captured using a *FCM* framework, following the model introduced by Mei et al. (2014). In this model, concepts  $C_i$   $i = 1, \dots, 10$  are categorized into three distinct groups:

- i) **Input concepts** - serve as model inputs, where  $C_1$  denotes proximity to infected individuals,  $C_2$  represents proximity to recovered individuals, and  $C_5$  signifies awareness of the global epidemic situation, reflecting the environmental cues perceived by the agent (primary emotions).
- ii) **Internal concepts** - encapsulate the individual's emotions and feelings, encompassing secondary emotions. Here,  $C_3$  denotes the individual's health state (as determined by epidemic behavior),  $C_4$  signifies awareness of the local epidemiological situation,  $C_6$  represents the assessment of both local and global epidemiological conditions,  $C_7$  indicates the level of optimism,  $C_8$  denotes memory of similar situations, and  $C_9$  encompasses instant reactions.
- iii) **Output concept** - corresponds to senior emotions ( $C_{10}$ ), representing the actions undertaken by the agent following a decision-making process.

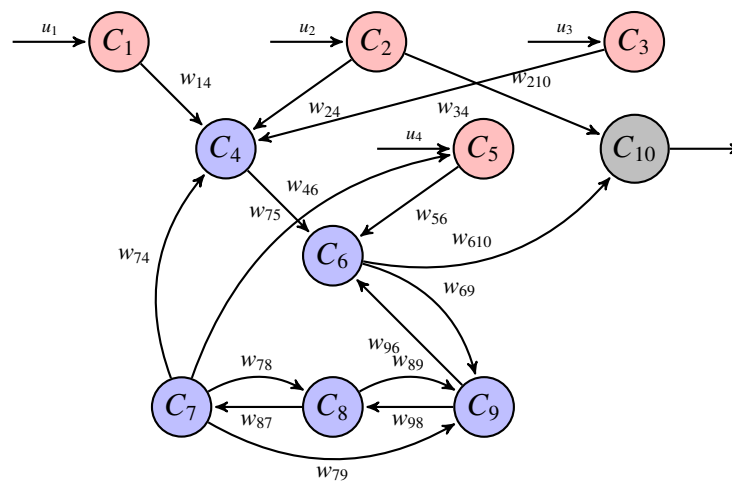

Figure 7: Diagram of the *FCM*.

443 The inputs of the model are  $u_1$  the density of infected agents that have contact with the agent,  $u_2$  the density of  
 444 recovered individuals that have contact with the agent,  $u_3$  the health state of the agent, and  $u_4$  the knowledge of the  
 445 local epidemiological situation. The value of  $C_{10}$  quantifies the individual's perception of the overall epidemiological  
 446 situation, controlling the size of the neighboring zone ( $C_{10} = r$ ) and  $C_{11}$  control the transitions of the activities block  
 447 of the agent.

448 Figure 7 illustrates the connections between the concepts  $C_i$  and inputs  $u_i$ , along with their corresponding weights.  
 449 The  $C_{10}$  value constrains the number of contacts an individual can make within the environment, thus influencing  
 450 the control entry  $u_i(t)$ . At each iteration, the values of input concepts  $C_1$  and  $C_2$  are estimated based on the number  
 451 of infected and recovered individuals in the agent's vicinity. The value of concept  $C_3$  is determined by entry  $u_3$  and  
 452 reflects the agent's health state transition.

#### 453 4.4. Model fitting

454 To assess the model's efficacy, we examine the impact of the Spanish flu outbreak in the Swiss canton of Geneva  
 455 in 1918 (Chowell et al., 2006). Our parameter estimation process involves a meticulous two-step approach. Initially,  
 456 a comprehensive **global search** across the parameter space is conducted to identify promising candidate regions,  
 457 employing stochastic optimization techniques such as simulated annealing (Deb et al., 2002). Subsequently, a **local**  
 458 **search** is performed within each candidate region using gradient-based optimization algorithms (Byrd et al., 2000)  
 459 to pinpoint the optimal parameters. Leveraging stochastic optimization methods ensures robust initial points for  
 460 gradient-based optimization techniques. The objective function employed in this process is the normalized square  
 461 error.

$$NMS E = \sum_{k=1}^m \frac{\|m_I(k) - d_I(k)\|_2^2}{\|m_I(k)\|_2^2}, \quad (6)$$

462 The variable  $m_I(k)$  represents the predicted number of infected agents (i.e., infected individuals) by the model, while  
 463  $d_I(k)$  corresponds to the epidemiological data collected during the outbreak. Table 3 presents the estimated parameters  
 464 of the proposed model.

Table 3: Model parameters

| $\beta$ | $\rho$ | $\gamma$ | $\alpha$ | $q$ | $\tau_I$ | $\tau_R$ | $N_e$ | $N_i$ |
|---------|--------|----------|----------|-----|----------|----------|-------|-------|
| 8.1     | 0.085  | 0.246    | 0.465    | 0.3 | 2.3      | 6.8      | 207   | 136   |

465 To calibrate the *FCM* algorithm proposed by Mei (Mei et al., 2014), we utilized training data. The computation of  
 466 each concept  $C_i$  takes into consideration the influence of other concepts  $C_j$   $j \neq i$ , along with the causal relationships  
 467 between them. Given that our model focuses on a localized outbreak (at the city level), assigning  $C_5 = 0.5$  equates  
 468 to a phase 4 alert status as per the World Health Organization guidelines. This phase is characterized by confirmed  
 469 instances of human-to-human transmission within the community.

470 In the training of the *FCM*, another crucial aspect to consider is the choice of threshold function utilized to update  
 471 concepts  $C_i$ . While the sigmoid function is a common choice for this purpose, it's important to note that its domain  
 472 and range are bounded. To ensure consistency across the inference interval, a linear function is employed, preserving  
 473 the same slope throughout. This approach is particularly advantageous for modeling individual behavior during the  
 474 Spanish flu outbreak. Por supuesto, aquí tienes la notación en LaTeX para la ecuación revisada:

$$f(x) = \frac{\frac{1}{2}x}{2(\rho_1 + \rho_2\|W\|)\sqrt{n}} + \frac{1}{2}, \quad (7)$$

475 where  $\rho_1$  and  $\rho_2$  represent values within the range of  $[0, 1]$ ,  $n$  denotes the total number of concepts, and  $W$  denotes  
 476 the weight matrix defined as

$$W = \begin{pmatrix} 0 & 0 & 0 & 0.34 & 0 & 0 & 0 & 0 & 0 & 0 & 0 \\ 0 & 0 & 0 & -0.14 & 0 & 0 & 0 & 0 & 0 & 0 & -0.34 \\ 0 & 0 & 0 & 0.44 & 0 & 0 & 0 & 0 & 0 & 0 & 0 \\ 0 & 0 & 0 & 0 & 0 & 0.52 & 0 & 0 & 0 & 0 & 0 \\ 0 & 0 & 0 & 0 & 0 & -0.05 & 0 & 0 & 0 & 0 & 0 \\ 0 & 0 & 0 & 0 & 0 & 0 & 0 & 0 & 0 & 0.85 & 0.37 \\ 0 & 0 & 0 & -0.13 & -0.27 & 0 & 0 & -0.03 & -0.25 & 0 & 0 \\ 0 & 0 & 0 & 0 & 0 & 0 & -0.21 & 0 & -0.07 & 0 & 0 \\ 0 & 0 & 0 & 0 & 0 & -0.14 & 0 & 0.09 & 0 & 0 & 0 \\ 0 & 0 & 0 & 0 & 0 & 0 & 0 & 0 & 0 & 0 & 0 \end{pmatrix}$$

477

#### 478 4.5. Model validation

479 Figure 8 shows the simulation results provided by the *SEIR* model developed by Chowell et al. (Chowell et al.,  
480 2006), the *ABM* model proposed by Lopez et al. (López and Rodó, 2020) and the one proposed in this work. The  
481 average behaviors of both *ABM* models are estimated from 1000 numerical simulations. Figure 9 shows the residuals  
482 of the models along the epidemic process (Figure 9.a) and their distributions (Figure 9.b), allowing to evaluate their  
483 ability to reproduce the epidemic dynamic.

484 Figure 8 shows the results for each model. Only the proposed model captures the epidemic dynamic along the  
485 entire process. The number of infected agents grows rapidly until reaches the peak (day 23), then it decreases until  
486 vanished with two different velocities: In the period after the peak (days 30 to 50) the number of infected falls from  
487 228 to 22, and then it falls from 22 to 10 (days 50 to 70) in similar periods.

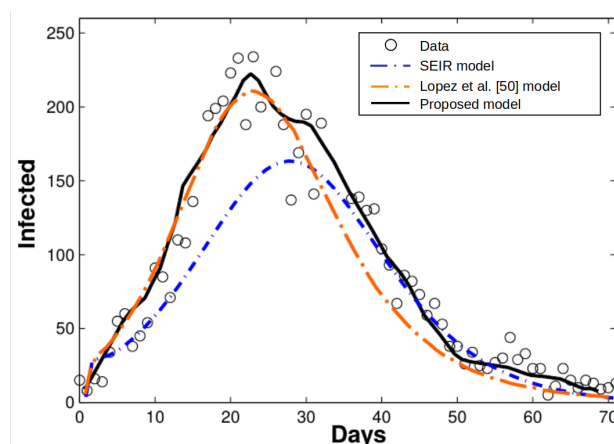

Figure 8: Average responses of the models and real data.

488 The *ABM* model proposed by López et al. (2020) captures the initial phase up to the peak (days 0 to 30), estimating  
489 correctly the time and magnitude of the peak. However, it fails to reproduce the epidemic data in the final phase (days  
490 30 to 70). Finally, the *SEIR* model only captures the end phase of the epidemic process (days 35 to 70). It fails to  
491 reproduce the epidemic behavior in its initial phase (days 0 to 35) and to estimate the time and magnitude of the peak  
492 (see Figure 9.a).

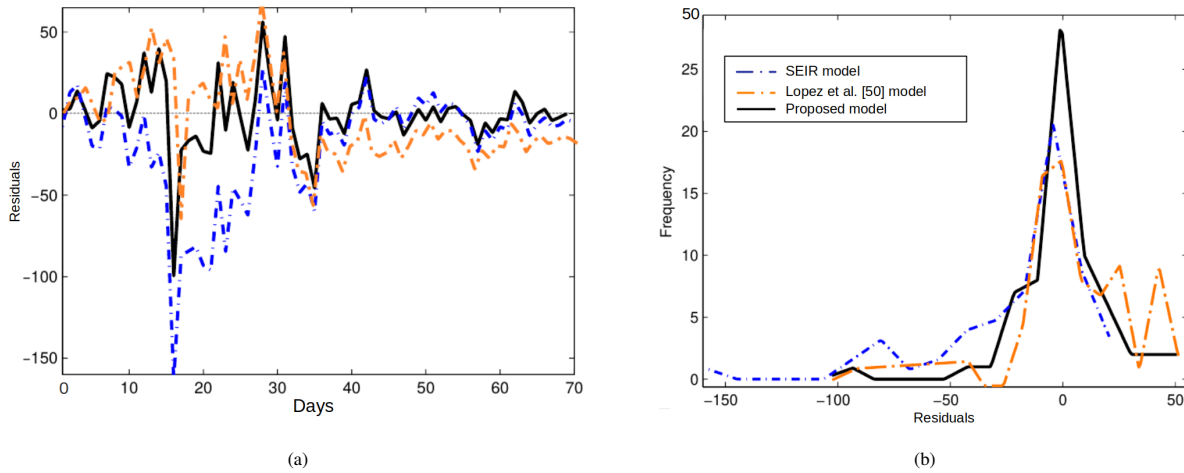

Figure 9: (a) Residuals of the model and (b) distribution of residuals.

493 Figure 9.a shows the residual distribution of overtime. The larger residuals occur around the peak ( $15 \leq k \leq 35$   
 494 days), while the initial ( $0 \leq k \leq 15$  days) and final ( $35 \leq k \leq 70$  days) phases have smaller magnitudes. During  
 495 this period, the data show higher variability due to the irregularity of reporting cases. The magnitude of the residuals  
 496 generated by the proposed model is lower than the ones generated by the other models. Only 10% of its samples are  
 497 larger than  $\pm 25$  and 3% larger than  $\pm 50$ . The *ABM* model of Lopez et al. (López and Rodó, 2020) generates 20% of  
 498 residuals larger than  $\pm 25$  and 6% larger than  $\pm 50$ . Finally, the *SEIR* model generates 25% of residuals larger than  $\pm 25$   
 499 and 10% larger than  $\pm 50$ .

Table 4: Statistics of residuals

| Model          | $\bar{X}$ | $M_d$ | <i>std</i> | <i>S</i> | Kurtosis | Skewness |
|----------------|-----------|-------|------------|----------|----------|----------|
| <i>SEIR</i>    | -19.57    | -9.15 | 54.75      | -0.57    | +1.51    | +0.84    |
| Social network | +1.63     | -4.89 | 46.41      | +0.42    | +1.08    | +0.77    |
| Explicit space | -2.03     | -1.83 | 10.24      | -0.06    | +2.12    | -0.12    |

500 Figure 9.b shows the residual distribution of each model. Their statistical parameters are shown in Table 4,  
 501 where  $\bar{x}$  denotes the mean,  $M_d$  the mode, *std* the standard deviation and *S* the bias coefficient computed using the  
 502 second Pearson coefficient formula  $S = 3(\bar{x} - M_d)/std$ . The distribution of the proposed model has a similar mean  
 503 ( $\bar{x} = -2.03$ ) and mode ( $M_d = -1.83$ ) with a nil bias coefficient ( $S = -0.06$ ). The skewness coefficient shows a  
 504 symmetric distribution of the residuals (*skew* = -0.12) although it is peaky (*kurt* = 2.12). On the other hand, the  
 505 residuals distribution of the *SEIR* and *ABM* model of Lopez et al. (López and Rodó, 2020) are biased and offsetting  
 506 in different directions: the *SEIR* residuals are biased toward the left, while the *ABM* of Lopez et al. towards the right  
 507 of the distributions mean.

508 The model was also numerically validated using the *Akaike information criterion*

$$AIC = \log\left(\det\left(\frac{1}{m} \sum_1^m \varepsilon(t, \Theta)(\varepsilon(t, \Theta))^T\right)\right) + \frac{2n}{m}, \quad (8)$$

509 where  $\Theta$  is the set of  $n$  uncertainty parameters,  $m$  is the number of simulations or samples, and  $\varepsilon(t, \Theta)$  is the error  
 510 measure. It measures the model quality considering accuracy and complexity simultaneously. It is widely used to  
 511 measure the quality of models and validate them (Symonds and Moussalli, 2011), being equivalent to a cross *k*-leave-  
 512 one-out method in longitudinal data models validation (Fang, 2011). The resulting coefficients are  $AIC = 7.5$  for the  
 513 *SEIR* model,  $AIC = 6.1$  for the networked *ABM* model, and  $AIC = 3.8$  for the proposed model.

514 The residuals of the models were computed using *NMSE* function defined in (6), resulting in a  $NMSE = 3.3$  for  
 515 the *SEIR* model, a  $NMSE = 1.6$  for the *ABM* model of Lopez et al. (López et al., 2020) and a  $NMSE = 1.05$  for the



516 proposed model. These results were computed from the data and the average behavior of 1000 simulations for each  
 517 model.

518 Finally, the statistical significance of these results was assessed by comparing the probability of residuals. For  
 519 this test, statistical independence of error adjustment for different data sets is assumed and the errors of binomial  
 520 distributions are approximated with a Gaussian distribution. Three new datasets for each model were generated with  
 521 gaps (data points removed) in the data used to estimate the parameters chosen with uniform probability: *i* one dataset  
 522 with 10 data points removed, *ii* the other with 20 data points removed and *iii* the last one with 30 data points removed.  
 523 The parameters of each model were estimated from each data set following the same procedure like the described in  
 524 Subsection 4.4. Then, 1000 simulations were executed for each parameter set to gather a reliable approximation of the  
 525 average response and the corresponding residuals. Finally, we tested the hypothesis  $P(Error_{model} < Error_{SEIR}) > p$   
 was tested for each parameter set. Table 5 presents the results.

Table 5: Errors significance for models

| 10 Data points |       |       |          |                                |                |
|----------------|-------|-------|----------|--------------------------------|----------------|
| Model          | Error | $\mu$ | $\sigma$ | $\frac{\mu_1 - \mu_2}{\sigma}$ | $P(p_1 < p_2)$ |
| Explicit space | 8.1   | 0.92  | 0.0044   | 3.62                           | 0.986          |
| Social network | 8.2   | 0.92  | 0.0045   | 3.58                           | 0.985          |
| <i>SEIR</i>    | 10.04 | 0.896 | 0.005    |                                |                |
| 20 Data points |       |       |          |                                |                |
| Model          | Error | $\mu$ | $\sigma$ | $\frac{\mu_1 - \mu_2}{\sigma}$ | $P(p_1 < p_2)$ |
| Explicit space | 4.75  | 0.95  | 0.0035   | 1.85                           | 0.986          |
| Social network | 5.15  | 0.95  | 0.0036   | 1.85                           | 0.988          |
| <i>SEIR</i>    | 5.75  | 0.943 | 0.0038   |                                |                |
| 30 Data points |       |       |          |                                |                |
| Model          | Error | $\mu$ | $\sigma$ | $\frac{\mu_1 - \mu_2}{\sigma}$ | $P(p_1 < p_2)$ |
| Explicit space | 4.5   | 0.955 | 0.0034   | 2.81                           | 0.99           |
| Social network | 4.9   | 0.951 | 0.0034   | 2.81                           | 0.99           |
| <i>SEIR</i>    | 5.88  | 0.941 | 0.0038   |                                |                |

526

## 527 5. Results and discussion

528 This section assesses the capabilities of the proposed framework to model different scenarios by analyzing the  
 529 effects of the agent's epidemiological awareness and initial population distribution on the epidemic dynamic.

### 530 5.1. Perception of epidemic situation

531 Interactions are essential for comprehending epidemic development, severity, and progression. The proposed  
 532 model offers valuable insights into the underlying mechanisms driving epidemic spread by shedding light on the  
 533 nuanced dynamics resulting from the interplay between perceptions and actions. To illustrate how the individual be-  
 534 havior block shapes the epidemic dynamics, the agents' perception of an epidemic is modified through  $C_5$ , a composite  
 535 measure of the information registered from media channels like television, radio, newspapers, and social platforms.

536 The values of  $C_5$  for each agent were obtained from a normal distribution for each simulation. Firstly, agents  
 537 **indifference** to epidemic were modeled using a  $C_5$  mean value of 0.15. Then, agents **concern** about epidemic were  
 538 modeled using a  $C_5$  mean value of 0.85. Finally, agents showing a balance between caution and disregard, like in a  
 539 **normal scenario**, were considered through a  $C_5$  mean value of 0.5. Figures 10 show the average behaviors of 500  
 540 simulations for each scenario, where agents were uniformly distributed at the beginning of the simulation.

541 Figure 10.a shows the behaviors for an indifference scenario ( $C_5 = 0.15$ ). The peak is significantly higher than  
 542 the real response (see Figure 8) with a delayed start and shorter epidemic process. This behavior is consistent with  
 543 the assumptions since agents show high mobility, amplifying the likelihood of effective contact and the daily tally  
 544 of infections. Figure 10.b shows the collective behavior for a normal scenario. Remarkably, it closely mirrors the

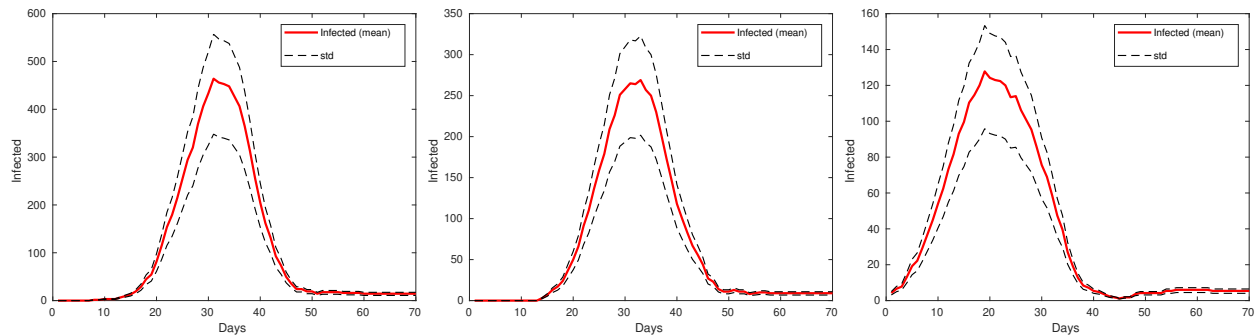

Figure 10: Average response and standard deviation for (a) indifferent, (b) normal and (c) concerned agents' attitude.

dynamic behavior depicted in Figure 8, particularly in the similarity of the peak of cases. This observation emphasizes the pivotal role of individual perception in shaping overall epidemic dynamics (Abdulkareem et al., 2020). Finally, Figure 10.c shows the average collective behavior for a cautious scenario ( $C_5 = 0.85$ ). As it was anticipated, the peak is significantly lower than the real response (see Figure 8) with a similar duration and a small secondary wave after day 45. These behaviors are consistent with the assumptions since individuals reduce their mobility, decreasing the probability of effective contact.

## 5.2. Distribution

By relaxing the assumption of homogeneity, we uncover behaviors that deviate significantly from the ideal scenario. Specifically, when initially infected agents occupy a small portion of the interaction region a noticeable decrease in the epidemic incidence is observed: the peak happens earlier and its magnitude is lower. However, the epidemic process lasts longer, and a secondary wave appears. This phenomenon can be attributed to the heterogeneity of agent distribution that slows down the transmission dynamics.

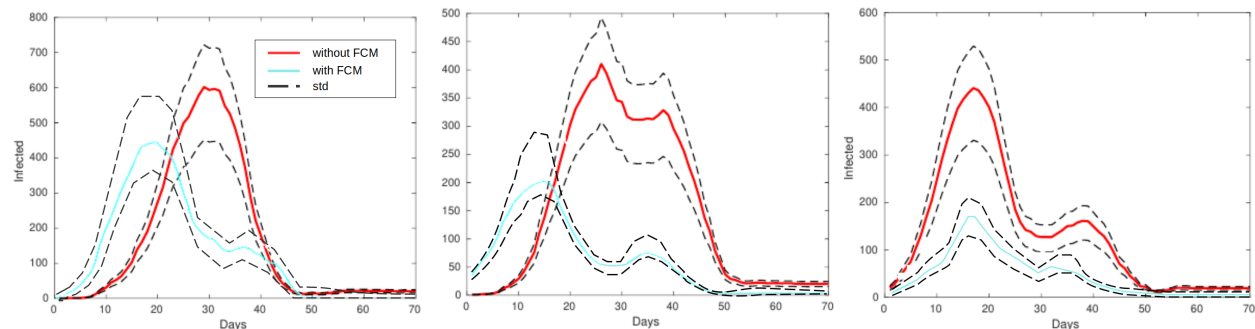

Figure 11: Average response and standard deviation for (a) full, (b) a 1/4 and (c) 1/8 distribution of initial infected agents.

Figures 11 show the average behaviors of 500 simulations with different initial distributions of infected agents. The number of initial infected agents is 0.1% of the population. One set of simulations were performed without the individual behavior block (without *FSM*), such that they move according to daily activities. In this configuration simulations show a similar number of infected agents at the peak (around 400 agents), the process begins earlier and ends in similar periods (around day 50).

The other set of simulations were performed including the effect of perceptions on the behavior of the agents (with *FSM*), such that they move combining daily activities with perception. In this configuration simulations show a lower number of infected agents, the process begins earlier and ends in similar periods (around day 50). Once again, we noted the impact of delayed recovery, attributed to individuals' tendencies to distance themselves from groups, thereby opting for voluntary isolation. This behavior underscores the significance of individuals' awareness of the

567 epidemic context in their immediate surroundings, leading to a heightened sense of paranoia and social avoidance  
568 phenomenon facilitated by the integration of *FCM* into individual behaviors.

569 In essence, our model is able of capturing the complex dynamics of individual interactions, ranging from cohesive  
570 group formations to voluntary isolation, under varying degrees of epidemic awareness. These findings underscore the  
571 model's robustness in simulating realistic scenarios of epidemic spread, providing valuable insights into the complex  
572 interplay between individual behaviors and epidemic dynamics.

## 573 **6. Conclusions**

574 Our study introduces an innovative approach for modeling epidemic dynamics by employing a contact network  
575 framework that not only captures temporal dynamics but also elucidates the social dimension of outbreaks through  
576 interactions among network actors. Our framework offers a transparent and straightforward implementation, demon-  
577 strating its capability to accommodate and to replicate real-world situations with remarkable precision. This multi-  
578 scale modeling approach facilitates the fitting of epidemic dynamics, akin to classic population-based models. Once  
579 fitted, epidemiological parameters can be uniformly assigned to individuals, enhancing model consistency across  
580 different contexts.

581 The integration of behavioral aspects via the individual behavior block enhances the model's ability to capture  
582 the dispersion of data across epidemic waves, particularly toward the epidemic's conclusion. Our model accurately  
583 replicates epidemic outbreaks, effectively reproducing the rapid surge in infected individuals at the epidemic's onset.  
584 Notably, it adapts well to varying input distributions for global epidemic perception, as demonstrated in Figures 10  
585 and 11 showcasing its robust performance under different scenarios.

586 The use of a Lagrangian formulation of self-organization to model social behavior significantly enhances effective  
587 contact between susceptible and infectious individuals, especially in homogeneous distributed environments. Addi-  
588 tionally, the output of *FCM* significantly influences individuals' interactions, capturing both rapid dynamics at the  
589 epidemic's onset and the emergence of smaller outbreaks as conditions improve.

590 Understanding and incorporating individual behavior and activities are crucial in epidemic modeling, as human  
591 behavior significantly influences disease dynamics. Our comprehensive approach, considering individual behaviors,  
592 emotions, and social interactions, contributes to a better understanding of disease spread and aids in the development  
593 of effective public health interventions. In summary, our study advances epidemiological research by providing a  
594 versatile modeling framework that improves epidemic predictions and enhances our understanding of the impact of  
595 individual behaviors on disease transmission dynamics.

596 Furthermore, to enhance the model's realism and reflect real-life scenarios more accurately, future work should  
597 focus on incorporating mechanisms of individual learning. In reality, individuals learn from previous experiences,  
598 which significantly influences their behavior and decision-making processes. To address this aspect, various options  
599 can be explored, such as language models or deep learning techniques, among others. By integrating learning mecha-  
600 nisms, the model can better capture the adaptive nature of human behavior in response to evolving epidemic situations.  
601 Additionally, the methodology presented in this study warrants validation with other diseases where behavioral factors  
602 play a crucial role, such as Tuberculosis. This validation process will provide further theoretical grounding and ensure  
603 the applicability and robustness of the model across different epidemiological contexts.

## 604 **Acknowledgments**

605 The authors wish to express their gratitude to the National University of Litoral (UNL) and the Research Institute  
606 for Signals, Systems, and Computational Intelligence (*sinc(i)*), Santa Fe, Argentina, as well as the National Scientific  
607 and Technical Research Council, Argentina, for their support. This work has been funded by the National Scientific  
608 and Technical Research Council.

## 609 **Funding**

610 This study was partly funded thanks to the Cesar Milstein program for scientists, belonging to the RAICES pro-  
611 gram of the Ministry of Science and Technology of the Argentine Republic.

## 612 Authors statement

613 **Leonardo López:** Conceptualization, Data curation, Formal analysis, Investigation, Methodology, Validation, Vi-  
614 sualization, Writing – original draft. **Leonardo Giovanini:** Conceptualization, Formal analysis, Funding acquisition,  
615 Investigation, Methodology, Supervision, Validation, Writing – original draft

## 616 References

- 617 , a. [cdc.gov. http://www.cdc.gov/vhf/ebola/outbreaks/2014-west-africa/](http://www.cdc.gov/vhf/ebola/outbreaks/2014-west-africa/). [Accessed 05-02-2024].
- 618 , b. SARS — Basics Factsheet — CDC — [cdc.gov. http://www.cdc.gov/sars/about/fs-SARS.html](http://www.cdc.gov/sars/about/fs-SARS.html). [Accessed 05-02-2024].
- 619 Abdulkareem, S.A., Augustijn, E.W., Filatova, T., Musial, K., Mustafa, Y.T., 2020. Risk perception and behavioral change during epidemics:  
620 Comparing models of individual and collective learning. *PloS one* 15, e0226483.
- 621 Adiga, A., Chu, S., Eubank, S., Kuhlman, C.J., Lewis, B., Marathe, A., Marathe, M., Nordberg, E.K., Swarup, S., Vullikanti, A., et al., 2018.  
622 Disparities in spread and control of influenza in slums of delhi: findings from an agent-based modelling study. *BMJ open* 8, e017353.
- 623 Anderson, J.R., Bothell, D., Byrne, M.D., Douglass, S., Lebiere, C., Qin, Y., 2004. An integrated theory of the mind. *Psychological review* 111,  
624 1036.
- 625 Barrett, C., Bisset, K., Leidig, J., Marathe, A., Marathe, M., 2011a. Economic and social impact of influenza mitigation strategies by demographic  
626 class. *Epidemics* 3, 19–31.
- 627 Barrett, C.L., Eubank, S., Marathe, A., Marathe, M.V., Pan, Z., Swarup, S., 2011b. Information integration to support model-based policy  
628 informatics. *The innovation journal: the public sector innovation journal* 16.
- 629 Barrett, C.L., Eubank, S.G., Marathe, M.V., 2008. An interaction-based approach to computational epidemiology., in: *AAAI*, pp. 1590–1593.
- 630 Bartik, A.W., Bertrand, M., Cullen, Z., Glaeser, E.L., Luca, M., Stanton, C., 2020. The impact of covid-19 on small business outcomes and  
631 expectations. *Proceedings of the national academy of sciences* 117, 17656–17666.
- 632 Becker-Asano, C., Wachsmuth, I., 2010. Wasabi as a case study of how misattribution of emotion can be modelled computationally. *A Blueprint  
633 for Affective Computing: a Sourcebook and Manual*, 179–193.
- 634 Bissett, K.R., Cadena, J., Khan, M., Kuhlman, C.J., 2021. Agent-based computational epidemiological modeling. *Journal of the Indian Institute of  
635 Science*, 1–25.
- 636 Bjørnstad, O.N., Shea, K., Krzywinski, M., Altman, N., 2020. Modeling infectious epidemics. *Nature methods* 17, 455–456.
- 637 Bonds, M.H., Keenan, D.C., Rohani, P., Sachs, J.D., 2010. Poverty trap formed by the ecology of infectious diseases. *Proceedings of the Royal  
638 Society B: Biological Sciences* 277, 1185–1192.
- 639 Byrd, R.H., Gilbert, J.C., Nocedal, J., 2000. A trust region method based on interior point techniques for nonlinear programming. *Math. Program.*  
640 89, 149–185.
- 641 Carruthers, P., 2011. *The opacity of mind: An integrative theory of self-knowledge*. OUP Oxford.
- 642 Chen, J., Chu, S., Chungbaek, Y., Khan, M., Kuhlman, C., Marathe, A., Mortveit, H., Vullikanti, A., Xie, D., 2016. Effect of modelling slum  
643 populations on influenza spread in delhi. *BMJ open* 6.
- 644 Chowell, Ammon, Hengartner, Hyman, 2006. Estimation of the reproductive number of the Spanish flu epidemic in Geneva, Switzerland. *Vaccine*  
645 24, 6747–6750.
- 646 Chowell, Ammon, Hengartner, Hyman, 2006. Transmission dynamics of the great influenza pandemic of 1918 in Geneva, Switzerland: assessing  
647 the effects of hypothetical interventions. *J. Theor. Biol.* 241, 193–204.
- 648 Cristiani, E., Priuli, F.S., Tosin, A., 2015. Modeling rationality to control self-organization of crowds: an environmental approach. *SIAM Journal  
649 on Applied Mathematics* 75, 605–629.
- 650 Cucker, F., Smale, S., 2005. Emergent behaviour in flocks. preliminary version.
- 651 Cutts, F., Dansereau, E., Ferrari, M., Hanson, M., McCarthy, K., Metcalf, C., Takahashi, S., Tatem, A., Thakkar, N., Truelove, S., et al., 2020.  
652 Using models to shape measles control and elimination strategies in low-and middle-income countries: a review of recent applications. *Vaccine*  
653 38, 979–992.
- 654 Damasio, A., 1994. *Descartes error: Emotion, reason, and the human brain*. New York: Putnam .
- 655 Dao-Ping, J., Xiao-Juan, B., YiXin, Y., Wei-Ren, S., 2007. Research on emotion theory and the decision models based on emotion. *Comput. Sci*  
656 34, 154–170.
- 657 Deb, K., Pratap, A., Agarwal, S., Meyarivan, T., 2002. A fast and elitist multiobjective genetic algorithm: NSGA-II. *IEEE Trans. Evol. Comput.*  
658 6, 182–197.
- 659 Dias, J., Mascarenhas, S., Paiva, A., 2014. Fatima modular: Towards an agent architecture with a generic appraisal framework. *Emotion modeling:  
660 Towards pragmatic computational models of affective processes*, 44–56.
- 661 Dignum, F., Dignum, V., Davidsson, P., Ghorbani, A., van der Hurk, M., Jensen, M., Kammler, C., Lorig, F., Ludescher, L.G., Melchior, A., et al.,  
662 2020. Analysing the combined health, social and economic impacts of the coronavirus pandemic using agent-based social simulation. *Minds  
663 and Machines* 30, 177–194.
- 664 El-Nasr, M.S., Yen, J., Ioerger, T.R., 2000. Flame—fuzzy logic adaptive model of emotions. *Autonomous Agents and Multi-agent systems* 3,  
665 219–257.
- 666 Epstein, J., 2006. *Generative social science: Studies in agent-based computational modeling*. Princeton Univ Pr.
- 667 Epstein, J.M., Parker, J., Cummings, D., Hammond, R.A., 2008. Coupled contagion dynamics of fear and disease: mathematical and computational  
668 explorations. *PloS one* 3, e3955.
- 669 Erten, E.Y., Lizier, J.T., Piraveenan, M., Prokopenko, M., 2017. Criticality and information dynamics in epidemiological models. *Entropy* 19, 194.
- 670 Fang, Y., 2011. Asymptotic equivalence between cross-validations and akaike information criteria in mixed-effects models. *Journal of data science*  
671 9, 15–21.

- 672 Fortuna, L.R., Tolou-Shams, M., Robles-Ramamurthy, B., Porche, M.V., 2020. Inequity and the disproportionate impact of covid-19 on commu-  
673 nities of color in the united states: The need for a trauma-informed social justice response. *Psychological Trauma: Theory, Research, Practice,*  
674 *and Policy* 12, 443.
- 675 Funke, D., Lamm, S., Meyer, U., Penschuck, M., Sanders, P., Schulz, C., Strash, D., von Looz, M., 2019. Communication-free massively distributed  
676 graph generation. *Journal of Parallel and Distributed Computing* 131, 200–217.
- 677 Giordano, G., Blanchini, F., Bruno, R., Colaneri, P., Di Filippo, A., Di Matteo, A., Colaneri, M., 2020. Modelling the covid-19 epidemic and  
678 implementation of population-wide interventions in italy. *Nature medicine* 26, 855–860.
- 679 Gratch, J., Marsella, S., 2004. A domain-independent framework for modeling emotion. *Cognitive Systems Research* 5, 269–306.
- 680 Gross, T., Blasius, B., 2008. Adaptive coevolutionary networks: a review. *Journal of the Royal Society Interface* 5, 259–271.
- 681 Gu, W., Li, W., Gao, F., Su, S., Sun, B., Wang, W., 2024. Influence of human motion patterns on epidemic spreading dynamics. *Chaos: An*  
682 *Interdisciplinary Journal of Nonlinear Science* 34.
- 683 Helbing, D., Yu, W., Rauhut, H., 2011. Self-organization and emergence in social systems: Modeling the coevolution of social environments and  
684 cooperative behavior. *The Journal of Mathematical Sociology* 35, 177–208.
- 685 Hethcote, H., 2000. The mathematics of infectious diseases. *SIAM review* , 599–653.
- 686 Hieida, C., Nagai, T., 2022. Survey and perspective on social emotions in robotics. *Advanced Robotics* 36, 17–32.
- 687 Hoertel, N., Blachier, M., Blanco, C., Olfson, M., Massetti, M., Rico, M.S., Limosin, F., Leleu, H., 2020. A stochastic agent-based model of the  
688 sars-cov-2 epidemic in france. *Nature medicine* 26, 1417–1421.
- 689 <https://www.facebook.com/WebMD>, . Pandemics — webmd.com. <https://www.webmd.com/cold-and-flu/what-are-epidemics-pandemics-outbreaks>.  
690 [Accessed 05-02-2024].
- 691 Karyotis, C., Doctor, F., Iqbal, R., James, A., Chang, V., 2018. A fuzzy computational model of emotion for cloud based sentiment analysis.  
692 *Information Sciences* 433, 448–463.
- 693 Kilbourne, E.D., 2006. Influenza pandemics of the 20th century. *Emerging infectious diseases* 12, 9.
- 694 Kofman, Y.B., Garfin, D.R., 2020. Home is not always a haven: The domestic violence crisis amid the covid-19 pandemic. *Psychological Trauma:*  
695 *Theory, Research, Practice, and Policy* 12, S199.
- 696 Kowalczyk, Z., Czubenko, M., 2016. Computational approaches to modeling artificial emotion—an overview of the proposed solutions. *Frontiers*  
697 *in Robotics and AI* 3, 21.
- 698 Kuylen, E., Willem, L., Broeckhove, J., Beutels, P., Hens, N., 2020. Clustering of susceptible individuals within households can drive measles  
699 outbreaks: an individual-based model exploration. *Scientific reports* 10, 19645.
- 700 Lazarus, R.S., 1991. *Emotion and adaptation*. Oxford University Press.
- 701 Lee, 2011. Bounded rationality and the emergence of simplicity amidst complexity. *Journal of Economic Surveys* 25, 507–526.
- 702 Letendre, K., Fincher, C.L., Thornhill, R., 2010. Does infectious disease cause global variation in the frequency of intrastate armed conflict and  
703 civil war? *Biological Reviews* 85, 669–683.
- 704 López, L., Fernandez, M., Gómez, A., Giovani, L., 2020. An influenza epidemic model with dynamic social networks of agents with individual  
705 behaviour. *Ecological Complexity* 41, 100810.
- 706 López, L., Rodó, X., 2020. The end of social confinement and covid-19 re-emergence risk. *Nature Human Behaviour* 4, 746–755.
- 707 Marinier III, R.P., Laird, J.E., Lewis, R.L., 2009. A computational unification of cognitive behavior and emotion. *Cognitive Systems Research* 10,  
708 48–69.
- 709 Marsella, S.C., 2003. Interactive pedagogical drama: Carmen’s bright ideas assessed, in: *International Workshop on Intelligent Virtual Agents*,  
710 Springer. pp. 1–4.
- 711 Masek, M., Lam, C.P., Benke, L., Kelly, L., Papisimeon, M., 2018. Discovering emergent agent behaviour with evolutionary finite state machines,  
712 in: *International conference on principles and practice of multi-agent systems*, Springer. pp. 19–34.
- 713 Mei, S., Zhu, Y., Qiu, X., Zhou, X., Zu, Z., Boukhanovsky, A.V., Sloot, P.M.A., 2014. Individual decision making can drive epidemics: a fuzzy  
714 cognitive map study. *IEEE Trans. Fuzzy Syst.* 22, 264–273.
- 715 Mogilner, A., Edelstein-Keshet, L., Bent, L., Spiros, A., 2003. Mutual interactions, potentials, and individual distance in a social aggregation.  
716 *Journal of mathematical biology* 47, 353–389.
- 717 Mortveit, H., Reidys, C., 2007. *An introduction to sequential dynamical systems*. Springer Science & Business Media.
- 718 Olfati-Saber, R., 2006. Flocking for multi-agent dynamic systems: Algorithms and theory. *IEEE Transactions on automatic control* 51, 401–420.
- 719 Olfati-saber, R., 2006. Flocking for multi-agent dynamic systems: Algorithms and theory. *IEEE Transactions on Automatic Control* 51, 401–420.
- 720 Palomo-Briones, G.A., Siller, M., Grignard, A., 2022. An agent-based model of the dual causality between individual and collective behaviors in  
721 an epidemic. *Computers in biology and medicine* 141, 104995.
- 722 Plutchik, R., 2001. The nature of emotions: Human emotions have deep evolutionary roots, a fact that may explain their complexity and provide  
723 tools for clinical practice. *American scientist* 89, 344–350.
- 724 Railsback, S.F., Grimm, V., 2019. *Agent-based and individual-based modeling: a practical introduction*. Princeton university press.
- 725 Reynolds, C.W., 1987. Flocks, herds and schools: A distributed behavioral model. *ACM SIGGRAPH computer graphics* 21, 25–34.
- 726 Reynolds, C.W., 1999. Steering behaviors for autonomous characters, in: *Game developers conference*, pp. 763–782.
- 727 Reynolds, C.W., 2000. Interaction with groups of autonomous characters, in: *Game Developers Conference*, pp. 449–460.
- 728 Rosenthal, D.M., Ucci, M., Heys, M., Hayward, A., Lakhanpaul, M., 2020. Impacts of covid-19 on vulnerable children in temporary accommoda-  
729 tion in the uk. *The Lancet Public Health* 5, e241–e242.
- 730 Scarpino, S.V., Petri, G., 2019. On the predictability of infectious disease outbreaks. *Nature communications* 10, 898.
- 731 Si, M., Marsella, S.C., Pynadath, D.V., 2006. Thespian: Modeling socially normative behavior in a decision-theoretic framework, in: *International*  
732 *Workshop on Intelligent Virtual Agents*, Springer. pp. 369–382.
- 733 Symonds, M.R., Moussalli, A., 2011. A brief guide to model selection, multimodel inference and model averaging in behavioural ecology using  
734 akaike’s information criterion. *Behavioral Ecology and Sociobiology* 65, 13–21.
- 735 Van Haeringen, E., Gerritsen, C., Hindriks, K.V., 2023. Emotion contagion in agent-based simulations of crowds: a systematic review. *Autonomous*  
736 *Agents and Multi-Agent Systems* 37, 6.

- 737 Ventura, P.C., Aleta, A., Rodrigues, F.A., Moreno, Y., 2022. Epidemic spreading in populations of mobile agents with adaptive behavioral response.  
738 Chaos, Solitons & Fractals 156, 111849.
- 739 Vigo, D., Patten, S., Pajer, K., Krausz, M., Taylor, S., Rush, B., Raviola, G., Saxena, S., Thornicroft, G., Yatham, L.N., 2020. Mental health of  
740 communities during the covid-19 pandemic.
- 741 Xiao-Juan, J.D.P.B., Wei-Ren, Y.Y.X.S., 2007. Research on emotion theory and the decision models based on emotion. Computer Science 4, 042.
- 742 Yeom, J.S., Bhatele, A., Bisset, K., Bohm, E., Gupta, A., Kale, L.V., Marathe, M., Nikolopoulos, D.S., Schulz, M., Wesolowski, L., 2014.  
743 Overcoming the scalability challenges of epidemic simulations on blue waters, in: 2014 IEEE 28th International Parallel and Distributed  
744 Processing Symposium, IEEE. pp. 755–764.
